1

2

3

4 Fusion with heat-resistant obscure (Hero) proteins have the potential to improve

5 the molecular property of recombinant proteins

6

7 Eri Morimoto<sup>1,2</sup>, Kotaro Tsuboyama<sup>2,3</sup>, Yukihide Tomari<sup>1,2,\*</sup>

8

9 <sup>1</sup>Department of Computational Biology and Medical Sciences, Graduate School of  
10 Frontier Sciences, The University of Tokyo, Bunkyo-ku, Tokyo, Japan

11

12 <sup>2</sup>Laboratory of RNA Function, Institute for Quantitative Biosciences, The University of  
13 Tokyo, Bunkyo-ku, Tokyo, Japan

14

15 <sup>3</sup>Department of Pharmacology, Northwestern Feinberg School of Medicine,  
16 Northwestern University, Chicago, IL, USA

17

18 \*Corresponding author

19 Email: [tomari@iqb.u-tokyo.ac.jp](mailto:tomari@iqb.u-tokyo.ac.jp) (YT)

20

21 **Abstract**

22 Although recombinant proteins are widely used in biotechnology and pharmaceutical  
23 industries, improving their solubility and stability is often a challenging issue. We  
24 recently discovered a class of highly unstructured heat-resistant obscure (Hero)  
25 proteins, which function to protect other “client” proteins *in trans* from various stresses  
26 *in vitro* and *in vivo*. Here, we show that fusion of Hero proteins *in cis* can enhance the  
27 molecular property of recombinant proteins. Fusion with Hero11 improved the  
28 otherwise challenging production of TAR DNA-binding protein of 43 kDa (TDP-43) in  
29 *Escherichia coli*. Moreover, fusing with Hero9 strongly protected the activity of firefly  
30 luciferase bearing destabilizing mutations against heat and other stress conditions.  
31 These data suggest that Hero proteins have the potential to be used as versatile  
32 stabilization tags for recombinant protein production.

33

## 34 Introduction

35 Recombinant proteins have been widely used in biotechnology and  
36 pharmaceutical industries [1]. *Escherichia coli* (*E. coli*) is one of the most common  
37 hosts to produce recombinant proteins with high yield and low cost. However,  
38 overexpressed proteins in *E. coli* often accumulate in inclusion bodies due to improper  
39 folding [2,3]. To overcome this limitation, fusion tags such as glutathione-S-transferase  
40 (GST) and maltose binding protein (MBP) are frequently used. While helpful in  
41 increasing the solubility, GST forms a homodimer in solution, which makes it unsuitable  
42 for oligomeric proteins [4,5]. MBP can also improve the solubility of tagged proteins, but  
43 MBP itself is a protein of ~42.5 kDa and this large size may increase the complexity in  
44 protein production and downstream processes [6,7].

45 Stability of recombinant proteins after purification is also crucial for their  
46 applications. Proteins are generally prone to denaturation especially under stress  
47 conditions such as heat and freeze-thaw cycles. Maltodextrin-binding protein from  
48 *Pyrococcus furiosus* (pfMBP) and RNase HI from *Sulfolobus tokodaii* (Sto-RNase HI)  
49 are known to increase not only the solubility but also the thermostability of recombinant  
50 proteins [8,9]. However, while “stabilization tags” are in high demand, they remain  
51 poorly explored.

52           We have previously reported that heat-resistant obscure (Hero) proteins, which  
53   are heat-soluble, hydrophilic, highly charged, and poorly characterized, are widespread  
54   in animals including humans. Among them, we chose to characterize 6 representative  
55   human Hero proteins, i.e., Hero7, 9, 11, 13, 20, and 45, whose numbers simply show  
56   their theoretical molecular weights. Through a series of experiments, we found that  
57   Hero proteins generally have activities to stabilize various “client” proteins *in vitro* and  
58   *in vivo* [10]. For example, Hero proteins can protect the enzymatic activity of lactate  
59   dehydrogenase (LDH) from desiccation *in vitro* or that of firefly luciferase (Fluc) from  
60   heat shock in HEK293T cells. Moreover, Hero proteins can prevent amyotrophic lateral  
61   sclerosis (ALS)-associated pathogenic protein aggregations of TAR DNA-binding  
62   protein of 43 kDa (TDP-43) in cultured motor neurons and in *Drosophila* models for  
63   neurodegenerative diseases [10]. We suggested that the amino acid composition and  
64   length of Hero proteins (i.e., their physical nature as long, hydrophilic, and highly  
65   charged polymers), rather than their primary amino acid sequence *per se*, may be  
66   important for their activity to protect client proteins [10]. In light of these stabilization  
67   effects previously demonstrated *in trans*, we hypothesized that Hero proteins may help  
68   protecting other proteins of interest *in cis*.

69           Here we show that, indeed, the molecular property of recombinant proteins can

70 be significantly enhanced by fusion with some Hero proteins. Fusing with Hero11  
71 improved the otherwise challenging production of recombinant TDP-43 in *E. coli*.  
72 Moreover, fusion with Hero9 strongly protected the enzymatic activity of Fluc bearing  
73 destabilizing mutations under stress conditions such as heat, freeze-thaw cycles, and  
74 protease treatment. These data suggest that Hero proteins have the potential as  
75 stabilization tags for recombinant proteins.

76

## 77 **Materials and methods**

### 78 **Plasmid construction**

79           A DNA fragment containing FLAG-tag and GST, Hero7, 9, 11, 13, 20, or 45  
80 (SERF2, C9orf16, C19orf53, C11orf58, BEX3, or SERBP1 respectively) was inserted  
81 into pCold I (Takara), together with the client protein, TDP-43, Fluc (WT), Fluc (SM;  
82 R188Q) or Fluc (DM; R188Q, R261Q) [11].

83

### 84 **Protein purification**

85           Recombinant tagged TDP-43 and Fluc proteins were expressed in *E. coli* BL21  
86 strain. The cells were cultivated in 6 or 13 mL for TDP-43 and in 250 mL for Fluc to an  
87 OD600 of 0.4–0.6 at 37 °C, and then grown at 15 °C overnight with 1 mM isopropyl- $\beta$ -  
88 D-thiogalactoside (IPTG) following cold-shock on ice for 20 min. For TDP-43, the cells  
89 were resuspended in lysis buffer [200 mM HEPES-KOH pH7.4, 200 mM KOAc, and  
90 200 mM Mg(OAc)<sub>2</sub>] supplemented with 0.2 mM TCEP, EDTA-free protease inhibitor  
91 cocktail (Roche), and DNase I, sonicated, and centrifuged at 10,000 x g for 10 min. The  
92 pellets were resuspended and sonicated again and the soluble and insoluble fractions  
93 were analyzed by SDS-PAGE and capillary-based Western blotting. For Fluc, the cells  
94 were resuspended in His A buffer [30 mM HEPES-KOH (pH 7.4), 200 mM KOAc, 5%

95 glycerol] supplemented with EDTA-free protease inhibitor cocktail (Roche), sonicated,  
96 and centrifuged at 10,000 x g for 5 min. The supernatant was added to a slurry of  
97 cOmplete His-Tag Purification Resin (Roche) or Ni Sepharose High Performance  
98 (Merck) and eluted with His B buffer (His A buffer containing 400 mM imidazole). The  
99 eluates were mixed with 20 % Glycerol and 1 mM DTT, snap-frozen by liquid-N<sub>2</sub> and  
100 stored at –80 °C.

101

## 102 **Capillary-based Western blotting**

103 Samples were prepared and analyzed by Jess according to the manufacturer's  
104 instruction (Protein Simple). Anti-DDDDK antibody was used as the primary antibody at  
105 1:100 (M185, MBL). Anti-mouse antibody was used as the secondary antibody at 1:100  
106 (Protein Simple).

107

## 108 **Stress conditions**

### 109 **High temperature**

110 For the *in-cis* experiments, 40 μL of tagged Fluc proteins (~40 nM) were  
111 incubated at 33 °C and 37 °C for 20 min, except that the 37 °C incubation for Fluc-DM  
112 was for 10 min. For the *in-trans* experiments, Fluc and GST, Hero9, Hero11, or lysis

113 buffer were mixed (final concentrations ~40 nM or 400 nM) in 40 uL and incubated at  
114 37 °C for 20 min (WT and SM) or 10 min (DM).

115

## 116 **Freeze and thaw cycles**

117 For the *in-cis* experiments, 80 µL of tagged Fluc proteins (~40 nM) were frozen  
118 at –80 °C for 30 min and thawed at room temperature for 10 min. This cycle was  
119 repeated twice. For the *in-trans* experiments, Fluc and GST, Hero9, Hero11, or lysis  
120 buffer were mixed (final concentrations ~40 nM) in 80 uL, frozen, and thawed twice.

121

## 122 **Proteinase K treatment**

123 For the *in-cis* experiments, 40 µL of tagged Fluc proteins (~40 nM) were  
124 incubated with 10 uL of Proteinase K (0.06 U/mL) for 30 min on ice. For the *in-trans*  
125 experiments, each Fluc and GST, Hero9, Hero11, or lysis buffer were mixed (final  
126 concentrations ~40 nM) in 40 uL and incubated with 10 uL of Proteinase K (0.06 U/mL).

127

## 128 **Luciferase assay**

129 The luciferase activities of Fluc were measured before and after the stress  
130 treatment, using sensilite Enhanced Flash Luminescence (Perkin Elmer) and SPARK



131 10 M plate reader (TECAN). The fractions of the remaining activity were then  
132 calculated.

133

## 134 **Cleavage of tags**

135 30 uL of tagged Fluc-WT proteins were incubated with Factor Xa (NEW  
136 ENGLAND BioLabs, final concentration 67 ug/mL) for 2 hours or overnight on ice.

137

## 138 **Results**

### 139 **Hero tags can improve the protein expression of TDP-** 140 **43 in *E. coli***

141 TDP-43 is intrinsically aggregation-prone, and it is generally difficult to produce  
142 TDP-43 as a recombinant protein in *E. coli* [12]. Based on our previous observation  
143 that Hero proteins can suppress aggregation of TDP-43 *in trans* in human cells [10], we  
144 wondered if Hero proteins can be used as fusion tags to increase the protein solubility  
145 *in cis* in the *E. coli* expression system. We constructed a series of expression vectors,  
146 in which TDP-43 was N-terminally tagged with His-FLAG and each of 6 representative  
147 human Hero proteins or GST as a control, or His-FLAG alone (Fig 1A). After protein  
148 expression, we separated the soluble and insoluble fractions and analyzed the soluble  
149 fraction by capillary-based quantitative Western blotting using anti-FLAG antibody. As  
150 previously reported [12], TDP-43 was mostly found in the insoluble fraction (Fig 1B),  
151 and many incomplete peptides and/or degradation products were detected in the  
152 soluble fraction (Fig 1C), highlighting the difficulty of recombinant TDP-43 production in  
153 *E. coli*. Compared to the His-FLAG alone (no tag), fusion with GST decreased the  
154 protein yield of full-length TDP-43 in the soluble fraction, whereas fusion with Hero9, 11  
155 and 20 did not compromise or slightly increased the yield (Fig 1D). Importantly, Hero11-

156 tagging significantly improved the integrity of soluble TDP-43, with much less  
157 degradation products compared to other tags (Fig 1E). We concluded that fusion with  
158 some Hero proteins has the potential to improve the otherwise challenging protein  
159 expression of TDP-43 in *E. coli*.

160

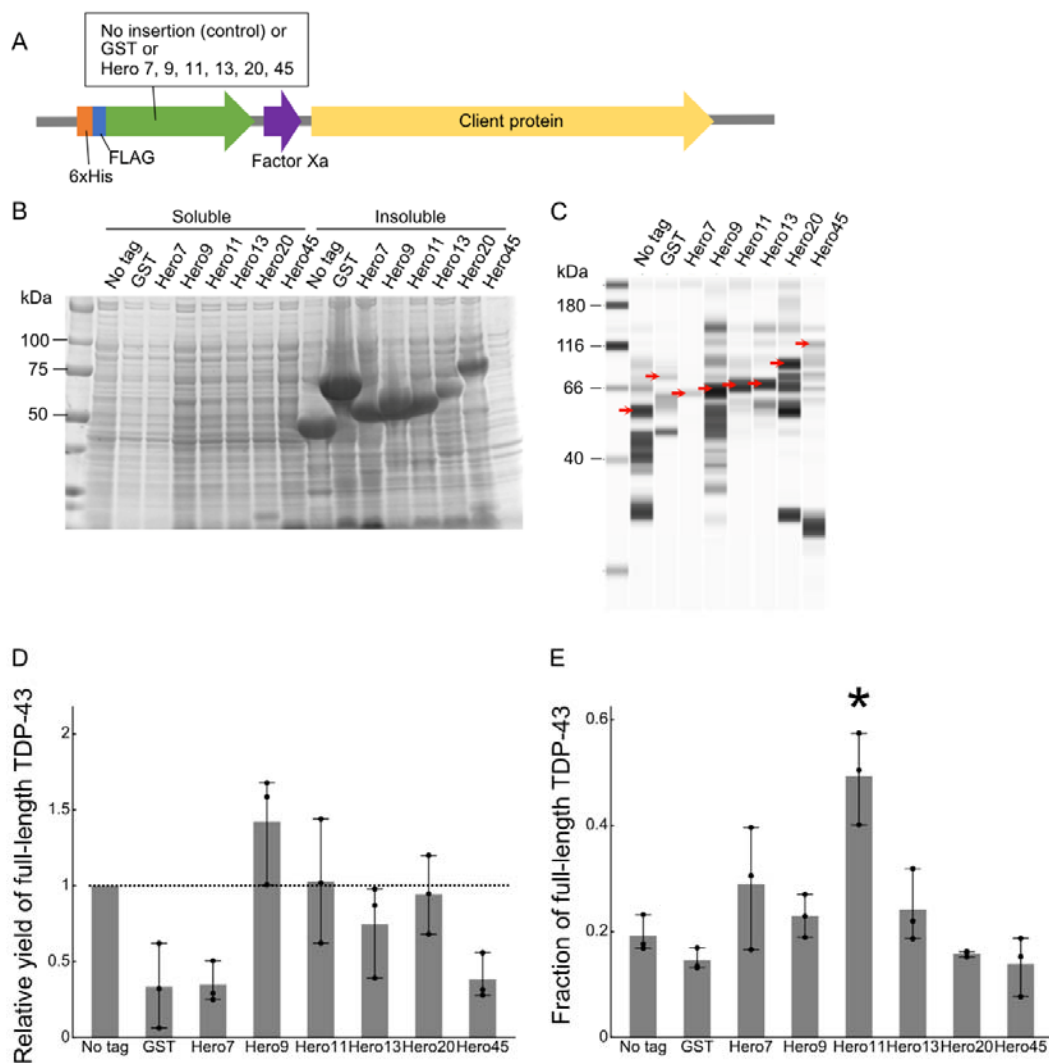

161

162

**Figure 1. Hero proteins improve the expression of TDP-43 in *E. coli*.**

- 163 (A) Schematic representation of Hero-tagged protein expression constructs.
- 164 (B) Expression of tagged TDP-43 proteins. TDP-43 fused with GST, each Hero protein  
165 (Hero7, 9, 11, 13, 20, or 45) or no tag was expressed in *E. coli*, and the soluble and  
166 insoluble fractions were analyzed by SDS-PAGE. Expected sizes are 50, 62, 57, 59,  
167 60, 62, 70, and 92 kDa for no tag, GST, Hero7, Hero9, Hero11, Hero13, Hero20,  
168 and Hero 45, respectively. A representative image from 3 independent experiments  
169 is shown. Note that extreme biases in amino acid composition of Hero proteins can  
170 affect the mobility of protein bands on SDS-PAGE [10].
- 171 (C) Capillary-based quantitative Western blotting of the soluble fractions in (B). A  
172 representative image from 3 independent experiments is shown. The bands marked  
173 with red arrows represent the full-length proteins.
- 174 (D) Relative quantification of the full-length proteins compared to no tag in (C). Mean  $\pm$   
175 SD from 3 independent experiments are shown. *P*-values were calculated by the  
176 Steel-Dwass test against no tag. None showed  $p < 0.05$ .
- 177 (E) Quantification of the fraction of the full-length proteins out of the total proteins in (C).  
178 Mean  $\pm$  SD from 3 independent experiments are shown. Fusion with Hero11  
179 resulted in the highest purity. *P*-values were calculated by Tukey HSD against no  
180 tag. \*Hero11:  $p = 0.01$ .

181

## 182 **Hero tags mitigate the loss of Fluc activity by heat**

183         We have previously demonstrated that co-expression of Hero proteins in  
184 HEK293T cells mitigate the loss of Fluc activity by heat shock [10]. To evaluate the  
185 protective effect *in cis in vitro*, we expressed Hero or GST-tagged Fluc in *E. coli* using  
186 the same expression constructs as our TDP-43 experiment above. Fluc is widely used  
187 as a bioluminescent reporter in various species including *E. coli*, and as expected it  
188 was expressed in the soluble fraction even without Hero or GST tag (Fig 2A). Because  
189 protein yields with Hero13 and 45 were extremely low, we excluded them from further  
190 experiments. We purified the series of recombinant tagged Fluc proteins and adjusted  
191 their concentrations (Fig 2B). After confirming that the luminescence activities are  
192 roughly comparable among all the samples (Fig S1), we exposed them to heat (Fig 2C)  
193 by incubating them at 33 °C (Fig 2D) or 37 °C (Fig 2E) for 20 min. We then measured  
194 the luminescence and calculated the loss of the enzymatic activity by heat incubation.  
195 Except for Hero11, all tags protected the Fluc activity from heat but only modestly (Figs  
196 2D and E).

197

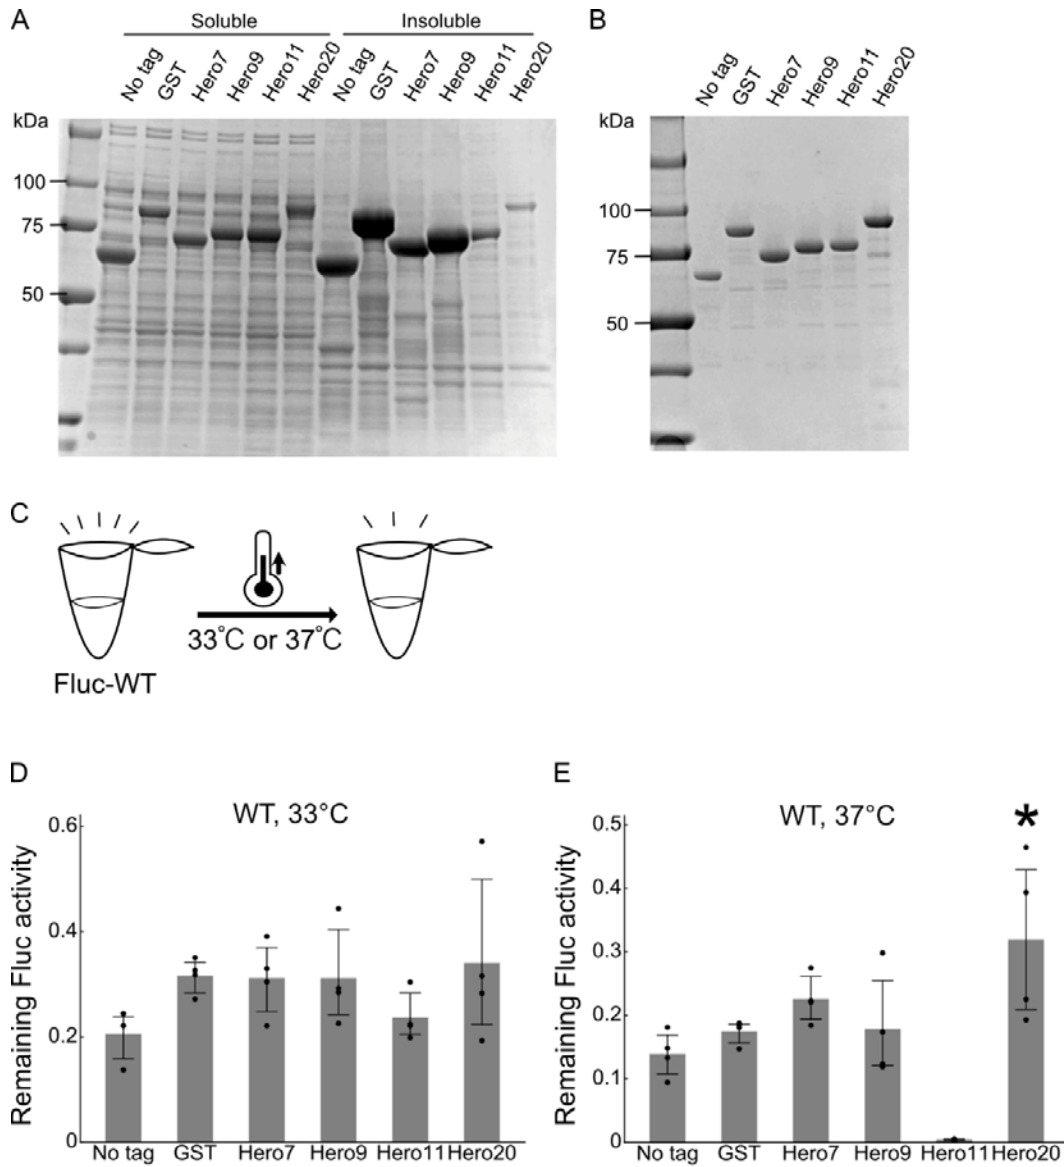

198

199 **Figure 2. Hero tags slightly mitigate the loss of Fluc activity by heat.**

200 (A) Expression of tagged Fluc proteins. Fluc fused with GST, each Hero protein (Hero7,

201 9, 11, or 20) or no tag was expressed in *E. coli*, and the soluble and insoluble

202 fractions were analyzed by SDS-PAGE.

203 (B) SDS-PAGE of His-purified Fluc proteins.

204 (C) Schematic representation of the heat treatment.

205 (D) Heat treatment of Fluc at 33°C for 20 min. Fractions of the remaining Fluc activities

206 after the heat incubation were calculated. Mean  $\pm$  SD from 4 independent

207 experiments are shown. *P*-values were calculated by Tukey HSD against no tag.

208 None showed  $p < 0.05$ .

209 (E) Heat treatment of Fluc at 37°C for 20 min. Fractions of the remaining Fluc activities

210 after the heat incubation were calculated. Mean  $\pm$  SD from 4 independent

211 experiments are shown. *P*-values were calculated by Tukey HSD against no tag.

212 \*Hero20:  $p = 0.0148$ .

213

214 Because wild-type (WT) Fluc is an intrinsically stable protein, fusion tags may

215 have only little space to improve its stability. It is known that the R188Q single-mutation

216 (SM) and the R188Q/R261Q double-mutation (DM) can strongly destabilize Fluc at

217 high temperatures ( $\geq 25$  °C), without severely compromising the enzymatic activity at

218 20 °C [11]. Therefore, we repeated the heat stress test using Fluc-SM (Figs 3A–D) and

219 DM (Figs 3A and E–G). Fusion with Hero9 or Hero20 significantly protected the activity

220 of Fluc-SM at both 33 °C and 37 °C (Figs 3C and D), whereas GST tag did not show

221 any apparent protection. For Fluc-DM, Hero9 was particularly effective in protecting the

222 enzymatic activity even at 37 °C (Figs 3F and G). We concluded that tagging with some  
223 Hero proteins can mitigate the destabilization of proteins by heat, especially for  
224 intrinsically unstable ones.  
225

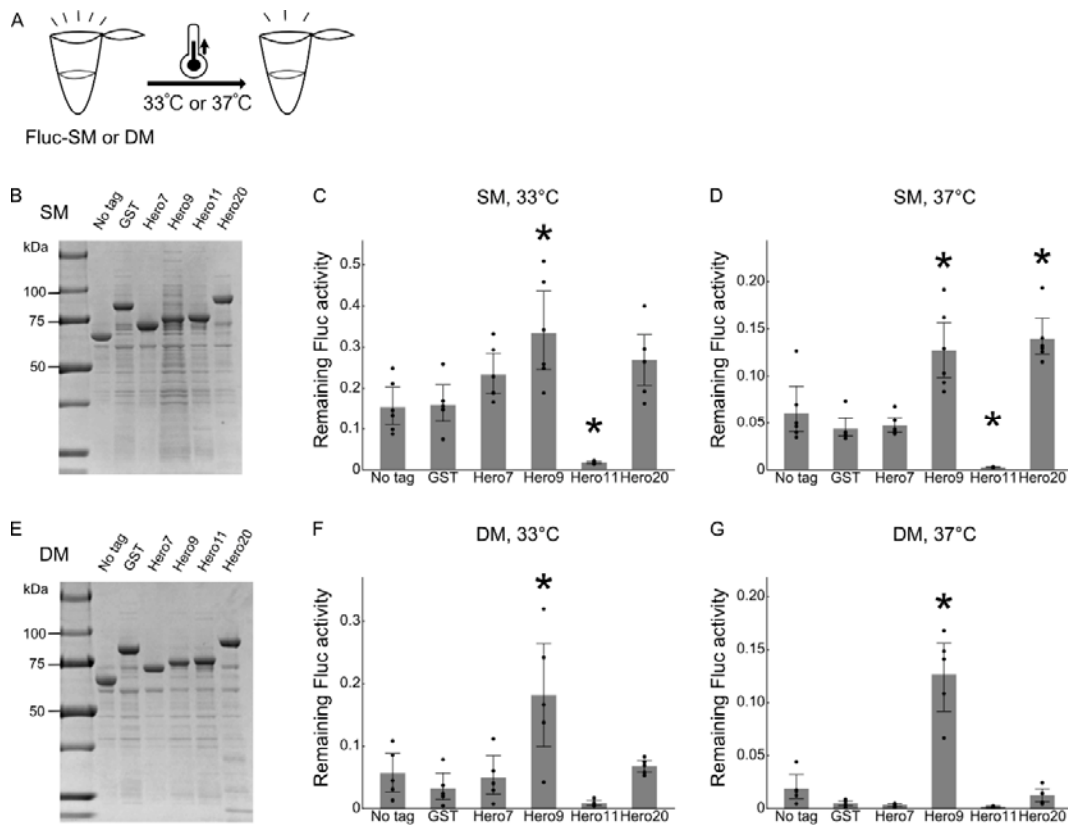

226

227 **Figure 3. Hero tags markedly mitigate the loss of mutated Fluc activity by heat.**

228 (A) Schematic representation of the heat treatment.

229 (B) SDS-PAGE of His-purified Fluc-SM proteins.

230 (C) Heat treatment of Fluc-SM at 33 °C for 20 min. Fractions of remaining Fluc

231 activities after the heat incubation were calculated. Mean ± SD from 6 independent



232 experiments are shown. *P*-values were calculated by Tukey HSD against no tag.

233 \*Hero9:  $p = 0.0038$ , Hero11:  $p = 0.0455$ .

234 (D) Heat treatment of Fluc-SM at 37 °C for 20 min. Fractions of remaining Fluc

235 activities after the heat incubation were calculated. Mean  $\pm$  SD from 6 independent

236 experiments are shown. *P*-values were calculated by Tukey HSD against no tag.

237 \*Hero9:  $p = 0.0017$ , Hero11:  $p = 0.007$ , Hero20:  $p = 0.001$ .

238 (E) SDS-PAGE of His-purified Fluc-DM proteins.

239 (F) Heat treatment of Fluc-DM at 33 °C for 20 min. Fractions of remaining Fluc

240 activities after the heat incubation were calculated. Mean  $\pm$  SD from 5 independent

241 experiments are shown. *P*-values were calculated by Tukey HSD against no tag.

242 \*Hero9:  $p = 0.0073$ .

243 (G) Heat treatment of Fluc-DM at 37 °C for 10 min. Fractions of remaining Fluc

244 activities after the heat incubation were calculated. Mean  $\pm$  SD from 5 independent

245 experiments are shown. *P*-values were calculated by Tukey HSD against no tag.

246 \*Hero9:  $p = 0.001$ .

247

## 248 **Hero tags protect Fluc activity from freeze-thaw cycles**

249 In general, proteins tend to be denatured by freezing and thawing [13]. Indeed,

250 2 cycles of freezing and thawing strongly compromised the Fluc-WT, SM and DM  
251 activity (Fig 4). Although GST mildly protected the Fluc activity from the freeze-thaw  
252 cycles, Hero9 and Hero20 showed superior protection activity for Fluc-SM and Fluc-DM  
253 (Figs 4B–D). These data suggest that Hero tags can be used to prevent the loss of  
254 function via freeze-thaw cycles (Figs 4B–D).

255

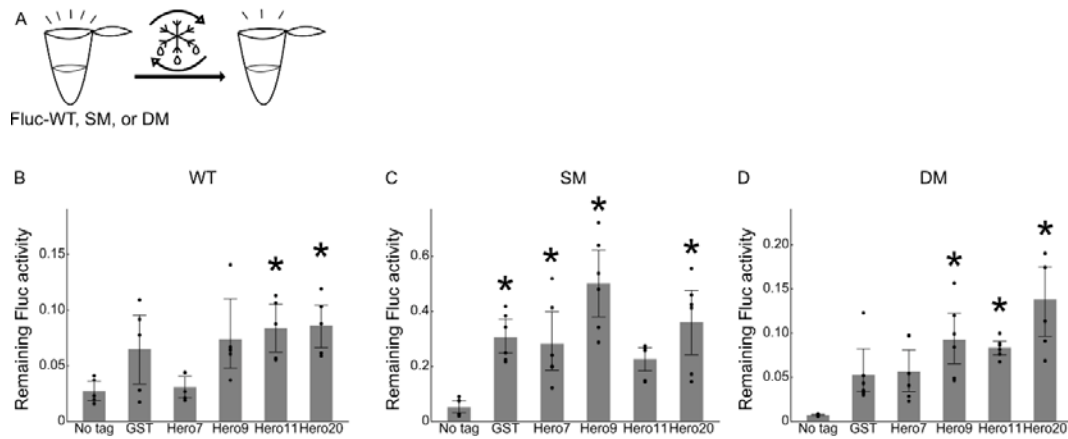

256

257 **Figure 4. Hero tags protect Fluc activity from freeze-thaw cycles.**

258 (A) Schematic representation of the freeze-thaw cycles.

259 (B) Freeze-thaw cycles of Fluc-WT. Fractions of remaining Fluc activities after the  
260 second cycle were calculated. Mean  $\pm$  SD from 5 independent experiments are  
261 shown. *P*-values were calculated by Tukey HSD against no tag. \*Hero11: *p* = 0.045,  
262 Hero20: *p* = 0.0344.

263 (C) Freeze-thaw cycles of Fluc-SM. Fractions of remaining Fluc activities after the

264 second cycle were calculated. Mean  $\pm$  SD from 6 independent experiments are  
265 shown. *P*-values were calculated by Tukey HSD against no tag. \*GST:  $p = 0.014$ ,  
266 Hero7:  $p = 0.0309$ , Hero9:  $p = 0.001$ , Hero20:  $p = 0.0018$ .

267 (D) Freeze-thaw cycles of Fluc-DM. Fractions of remaining Fluc activities after the  
268 second cycle were calculated. Mean  $\pm$  SD from 6 independent experiments are  
269 shown. *P*-values were calculated by Tukey HSD against no tag. \*Hero9:  $p = 0.0022$ ,  
270 Hero11:  $p = 0.0074$ , Hero20:  $p = 0.001$ .

271

## 272 **Hero tags protect Fluc activity from Proteinase K**

273 Since proteins are generally prone to degradation by proteases both *in vivo* and  
274 *in vitro*, we tested if Hero tags can protect client proteins from Proteinase K (PK), a  
275 representative serine protease. We incubated the series of Fluc-WT, SM, and DM  
276 proteins with PK for 30 min and measured their luminescence activity (Fig 5). While  
277 GST showed no shielding effect, Hero9 strongly protected the activity of Fluc-SM and  
278 DM from PK-mediated proteolysis (Figs 5C and D). Thus, fusion with Hero proteins  
279 may be used as a new strategy to confer increased protease resistance on client  
280 proteins.

281

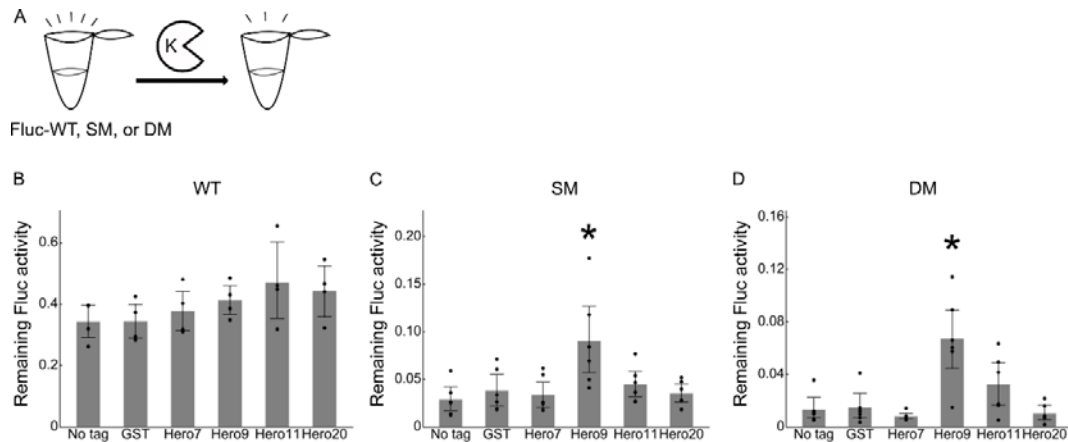

282

283 **Figure 5. Hero tags protect Fluc activity from Proteinase K.**

284 (A) Schematic representation of the PK treatment.

285 (B) PK treatment of Fluc-WT for 30 min. Fractions of remaining Fluc activities after the  
286 PK treatment were calculated. Mean  $\pm$  SD from 4 independent experiments. *P*-  
287 values were calculated by Tukey HSD against no tag. None showed  $p < 0.05$ .

288 (C) PK treatment of Fluc-SM for 30 min. Fractions of remaining Fluc activities after the  
289 PK treatment were calculated. Mean  $\pm$  SD from 6 independent experiments. *P*-  
290 values were calculated by Tukey HSD against no tag. \*Hero9:  $p = 0.0051$ .

291 (D) PK treatment of Fluc-WT for 30 min. Fractions of remaining Fluc activities after the  
292 PK treatment were calculated. Mean  $\pm$  SD from 6 independent experiments. *P*-  
293 values were calculated by Tukey HSD against no tag. \*Hero9:  $p = 0.001$ .

294

295 **Hero proteins protect Fluc activity better *in cis* than *in***

296 ***trans***

297           Finally, we compared the protective effect of Hero proteins *in cis* and *in trans*.  
298 We purified recombinant GST, Hero9 and Hero11 proteins (which were the most and  
299 least effective *in cis*, respectively), added each of them to the “no tag” Fluc protein in  
300 equimolar concentrations, and challenged the mixture with heat, freeze-thaw cycles, or  
301 PK. As shown in Figs S2A–I, the protective effect was only minimum in all the stress  
302 conditions. When the molarity of recombinant GST, Hero9, and Hero11 proteins was  
303 increased by 10-fold, we still did not observe any apparent enhancement (Figs S2J–L).  
304 We concluded that fusing with Hero proteins *in cis* works better than mixing with them  
305 *in trans*, at least to protect the Fluc activity *in vitro*. We also confirmed that, if necessary,  
306 Hero proteins can be detached from the fused client protein by incubating with Factor  
307 Xa (Fig S3).

## 308 **Discussion**

309           In this study, we demonstrated that Hero proteins can be used as useful fusion  
310 tags that can protect recombinant proteins under various stress conditions *in cis*. We  
311 envision that Hero tags act as a simple physical shield that prevents collisions of  
312 molecules leading to denaturation. In addition, Hero tags may be also helpful in  
313 promoting and maintaining the proper folding (i.e., secondary and tertiary structures) of  
314 client proteins by improving the molecular environment. In this sense, Hero may be  
315 reminiscent of polyethylene glycol (PEG), a post-production modification commonly  
316 used to increase the solubility and stability for biopharmaceuticals [14,15]. It is known  
317 that PEG itself can show immunogenicity albeit rarely, and the long-term toxicity of  
318 PEG-modified products has recently been cautioned [16,17]. To overcome this problem,  
319 researchers have developed “PAS,” an artificial polypeptide of defined sequence  
320 containing the 3 small amino acids Pro, Ala, and Ser. PAS is biodegradable and non-  
321 immunogenic, yet improves solubility in *E. coli* and protein half-lives *in vivo* [18]. Hero  
322 proteins may resemble PAS, except that they are from natural sources. In our current  
323 study, we tested only 6 representative Hero proteins, but the human genome encodes  
324 hundreds of Hero protein candidates, many of which remain to be characterized [10].  
325 Thus, it is possible that there are Hero proteins that act as better stabilization tags than

326 those tested in this study. Moreover, it will be interesting to examine in the future if  
327 tandem repeats of the same Hero protein or different Hero proteins in combination may  
328 increase the stabilization effect.

329       Toward the application of Hero tags, it is important to note that different Hero  
330 proteins have different preferences for their client proteins. For example, in our  
331 previous research, Hero7 and 11 showed strong resistance to heat shock when co-  
332 expressed with Fluc *in trans* in cultured human cells [10]. However, the *in-trans*  
333 protective effect of Hero11 was only minimum *in vitro* (Fig 2S). When fused *in cis*,  
334 Hero11 rather abolished the Fluc activity *in vitro*, while Hero9 showed the strongest  
335 protection (Figs 3–4). On the other hand, Hero11 strongly improved the integrity of  
336 soluble TDP-43 in the *E. coli* expression system (Figs 1C–E). Those data suggest that  
337 even the same Hero protein can behave differently depending on the client protein and  
338 condition. Compared to addition *in trans*, fusion *in cis* will not only enhance the  
339 frequency of the molecular interaction but also creates strong topological constraints  
340 between Hero proteins and their client proteins, which may explain the apparently  
341 different effects observed in *in-trans* and *in-cis* conditions. Unfortunately, it is currently  
342 difficult to predict the best combination between Hero proteins and clients, and it will be  
343 important to test multiple Hero proteins to identify one that best protects the protein of

344 interest. In summary, our current study provides the potential of Hero proteins as  
345 versatile stabilization tags for recombinant proteins and serve as a starting point for  
346 further optimization and engineering.

347



348 **Acknowledgements**

349 We are grateful to Andy Y. Lam for providing recombinant proteins of GST, Hero9 and

350 Hero11.

351

352 **Competing interests**

353 Y.T. and K.T. have a patent application related to this work. E.M. declares no competing

354 interests. This does not alter our adherence to PLOS ONE policies on sharing data and

355 materials.

356

## 357 **References**

- 358 1. BIOLOGICS MARKET - GROWTH, TRENDS, COVID-19 IMPACT, AND  
359 FORECASTS (2022 - 2027). [cited 3 Mar 2022]. Available:  
360 <https://www.mordorintelligence.com/industry-reports/biologics-market>
- 361 2. Chrnyk BA, Evans J, Lillquist J, Young P, Wetzel R. Inclusion body  
362 formation and protein stability in sequence variants of interleukin-1 $\beta$ . Journal  
363 of Biological Chemistry. 1993;268: 18053–18061. doi:10.1016/s0021-  
364 9258(17)46810-4
- 365 3. Williams DC, van Frank RM, Muth WL, Burnett JP. Cytoplasmic Inclusion  
366 Bodies in Escherichia coli Producing Biosynthetic Human Insulin Proteins.  
367 New Series. 1982.
- 368 4. Veal EA, Mark Toone W, Jones N, Morgan BA. Distinct roles for glutathione  
369 S-transferases in the oxidative stress response in Schizosaccharomyces  
370 pombe. Journal of Biological Chemistry. 2002;277: 35523–35531.  
371 doi:10.1074/jbc.M111548200
- 372 5. Kaplan W, Erhardt J, Sluis-Cremer N, Dirr H, Hüsler P, Klump H.  
373 Conformational stability of pGEX-expressed *Schistosoma japonicum*  
374 glutathione S-transferase: A detoxification enzyme and fusion-protein affinity

- 375 tag. Protein Science. 1997;6. doi:10.1002/pro.5560060216
- 376 6. Kapust RB, Waugh DS. Escherichia coli maltose-binding protein is  
377 uncommonly effective at promoting the solubility of polypeptides to which it  
378 is fused (1999). doi:10.1110/ps.8.8.1668
- 379 7. Dyson MR, Shadbolt SP, Vincent KJ, Perera RL, McCafferty J. Production of  
380 soluble mammalian proteins in Escherichia coli: Identification of protein  
381 features that correlate with successful expression. BMC Biotechnology.  
382 2004;4. doi:10.1186/1472-6750-4-32
- 383 8. Luke JM, Carnes AE, Sun P, Hodgson CP, Waugh DS, Williams JA.  
384 Thermostable tag (TST) protein expression system: Engineering  
385 thermotolerant recombinant proteins and vaccines. Journal of Biotechnology.  
386 2011;151: 242–250. doi:10.1016/j.jbiotec.2010.12.011
- 387 9. Takano K, Okamoto T, Okada J, Tanaka SI, Angkawidjaja C, Koga Y, et al.  
388 Stabilization by fusion to the C-terminus of hyperthermophile Sulfolobus  
389 tokodaii RNase HI: A possibility of protein stabilization tag. PLoS ONE.  
390 2011;6. doi:10.1371/journal.pone.0016226
- 391 10. Tsuboyama K, Osaki T, Matsuura-Suzuki E, Kozuka-Hata H, Okada Y,  
392 Oyama M, et al. A widespread family of heat-resistant obscure (Hero)

- 393 proteins protect against protein instability and aggregation. *PLoS Biology*.  
394 2020;18. doi:10.1371/journal.pbio.3000632
- 395 11. Gupta R, Kasturi P, Bracher A, Loew C, Zheng M, Vilella A, et al. Firefly  
396 luciferase mutants as sensors of proteome stress. *Nature Methods*. 2011;8:  
397 879–884. doi:10.1038/nmeth.1697
- 398 12. Capitini C, Conti S, Perni M, Guidi F, Cascella R, de Poli A, et al. TDP-43  
399 inclusion bodies formed in bacteria are structurally amorphous, non-amyloid  
400 and inherently toxic to neuroblastoma cells. *PLoS ONE*. 2014;9.  
401 doi:10.1371/journal.pone.0086720
- 402 13. Zhang A, Qi W, Singh SK, Fernandez EJ. A new approach to explore the  
403 impact of freeze-thaw cycling on protein structure: Hydrogen/deuterium  
404 exchange mass spectrometry (HX-MS). *Pharmaceutical Research*. 2011;28:  
405 1179–1193. doi:10.1007/s11095-011-0383-z
- 406 14. Milton Harris J, Chess RB. Effect of pegylation on pharmaceuticals. *Nature*  
407 *Reviews Drug Discovery*. 2003. pp. 214–221. doi:10.1038/nrd1033
- 408 15. Abuchowski A, van Es T, Palczuk NC, Davis FF. Alteration of immunological  
409 properties of bovine serum albumin by covalent attachment of polyethylene  
410 glycol. *Journal of Biological Chemistry*. 1977;252: 3578–3581.

- 411           doi:10.1016/s0021-9258(17)40291-2
- 412       16.   Sellaturay P, Nasser S, Islam S, Gurugama P, Ewan PW. Polyethylene  
413           glycol (PEG) is a cause of anaphylaxis to the Pfizer/BioNTech mRNA  
414           COVID-19 vaccine. *Clinical and Experimental Allergy*. Blackwell Publishing  
415           Ltd; 2021. pp. 861–863. doi:10.1111/cea.13874
- 416       17.   Fletcher AM, Tellier P, Douville J, Mansell P, Graziano MJ, Mangipudy RS, et  
417           al. Adverse vacuolation in multiple tissues in cynomolgus monkeys following  
418           repeat-dose administration of a PEGylated protein. *Toxicology Letters*.  
419           2019;317: 120–129. doi:10.1016/j.toxlet.2019.09.023
- 420       18.   Schlapschy M, Binder U, Börger C, Theobald I, Wachinger K, Kisling S, et al.  
421           PASylation: A biological alternative to PEGylation for extending the plasma  
422           half-life of pharmaceutically active proteins. *Protein Engineering, Design and  
423           Selection*. 2013;26: 489–501. doi:10.1093/protein/gzt023
- 424
- 425

## 426 **Supporting information**

### 427 **Figure S1. Basal Fluc activities are comparable with and without fusion tags.**

428 Basal Fluc activities before the stress tests in Figure 2. *P*-values were calculated by the

429 Steel-Dwass test against no tag. None showed  $p < 0.05$ .

430

### 431 **Figure S2. Fluc activities are only minimally protected by Hero proteins *in trans*.**

432 (A) Heat treatment of Fluc-WT mixed with buffer alone, equimolar GST, Hero9 or

433 Hero11 at 37 °C for 20 min.

434 (B) Heat treatment of Fluc-SM mixed with buffer alone, equimolar GST, Hero9 or

435 Hero11 at 37 °C for 20 min.

436 (C) Heat treatment of Fluc-DM mixed with buffer alone, equimolar GST, Hero9 or

437 Hero11 at 37 °C for 10 min.

438 (D) Freeze-thaw cycles of Fluc-WT mixed with buffer alone, equimolar GST, Hero9 or

439 Hero11.

440 (E) Freeze-thaw cycles of Fluc-SM mixed with buffer alone, equimolar GST, Hero9 or

441 Hero11.

442 (F) Freeze-thaw cycles of Fluc-DM mixed with buffer alone, equimolar GST, Hero9 or

443 Hero11.

444 (G) PK treatment of Fluc-WT mixed with buffer alone, equimolar GST, Hero9 or Hero11

445 for 30 min.

446 (H) PK treatment of Fluc-SM mixed with buffer alone, equimolar GST, Hero9 or Hero11

447 for 30 min.

448 (I) PK treatment of Fluc-DM mixed with buffer alone, equimolar GST, Hero9 or Hero11

449 for 30 min.

450 (J) Heat treatment of Fluc-WT mixed with buffer alone, 10-fold GST, Hero9 or Hero11

451 at 37 °C for 20 min.

452 (K) Heat treatment of Fluc-SM mixed with buffer alone, 10-fold GST, Hero9 or Hero11

453 at 37 °C for 20 min.

454 (L) Heat treatment of Fluc-DM mixed with buffer alone, 10-fold GST, Hero9 or Hero11

455 at 37 °C for 20 min.

456 For all the data, p-values were calculated by Tukey HSD against no tag. None showed

457  $p < 0.05$ .

458

459 **Figure S3. Detachment of GST or Hero tags from Fluc by Factor Xa-mediated**

460 **cleavage.**

461

Figure 1

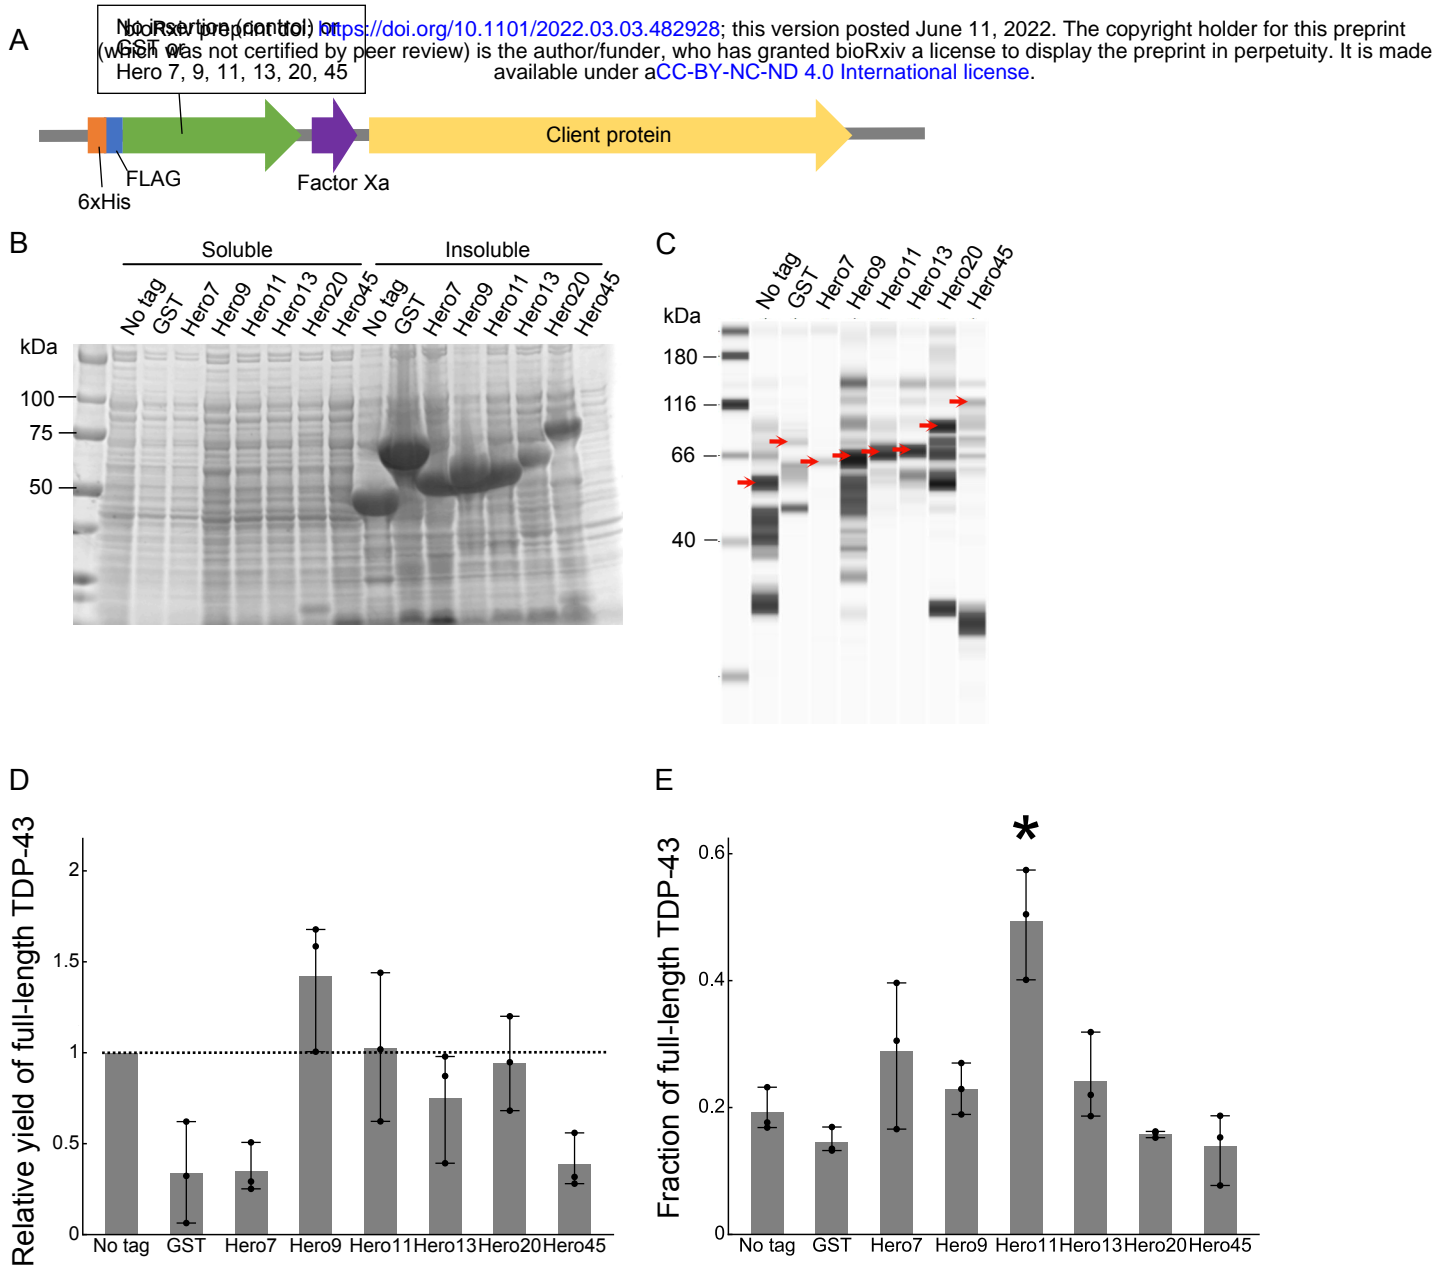



Figure 2

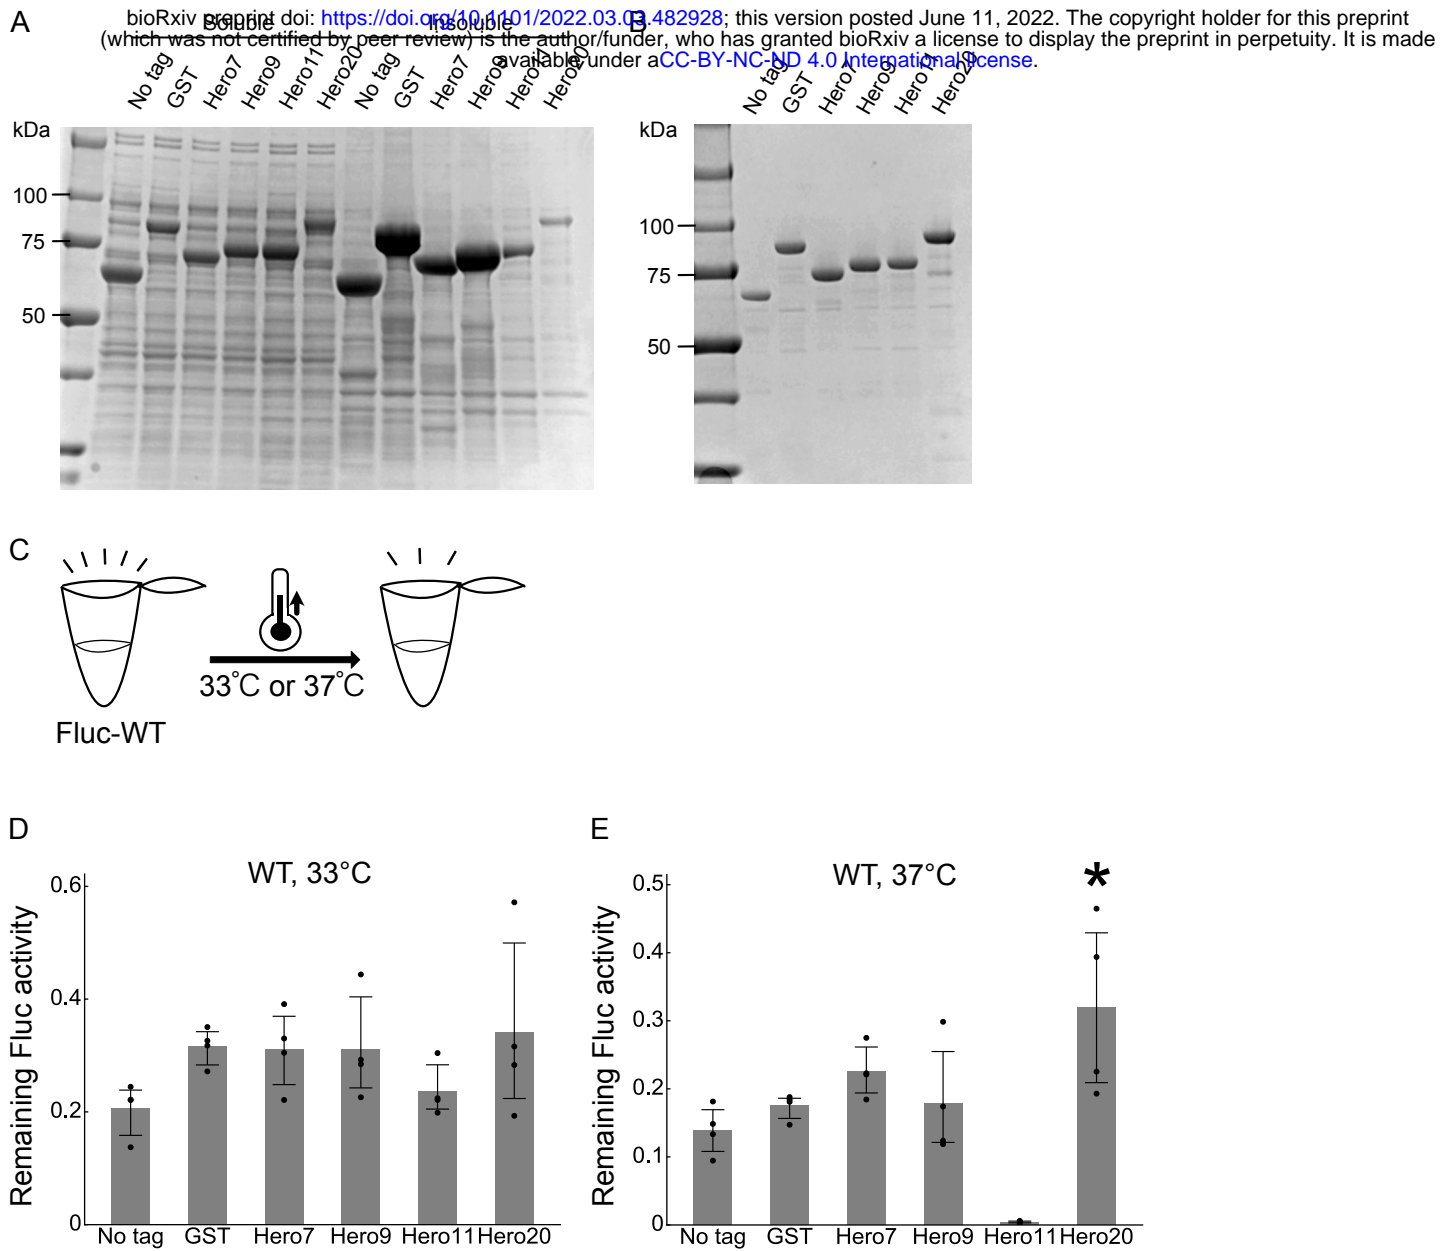

Figure 3

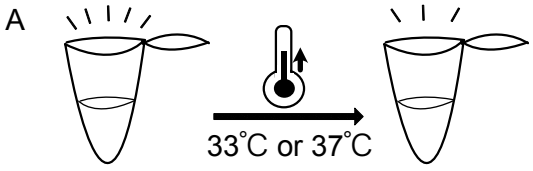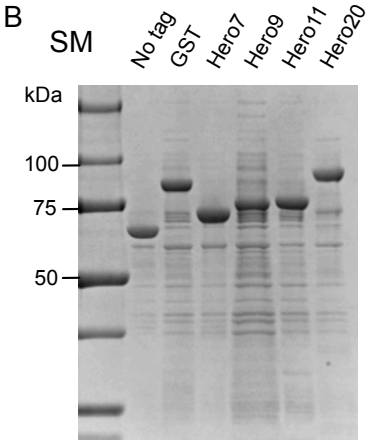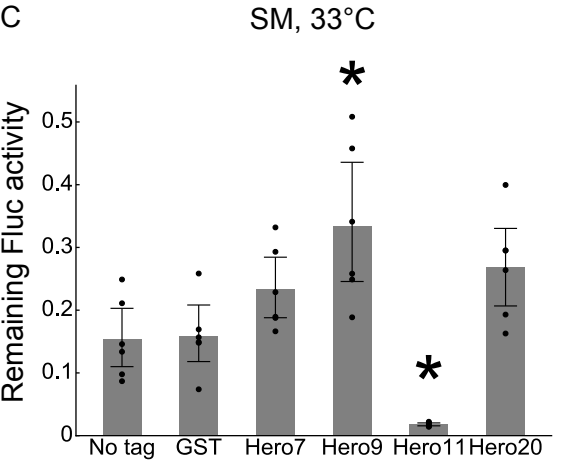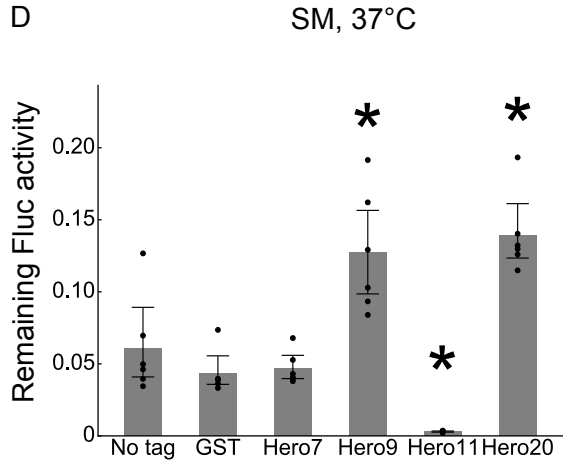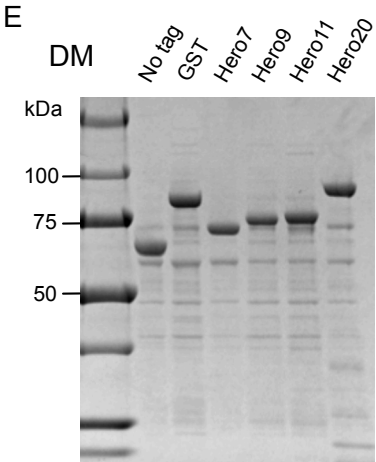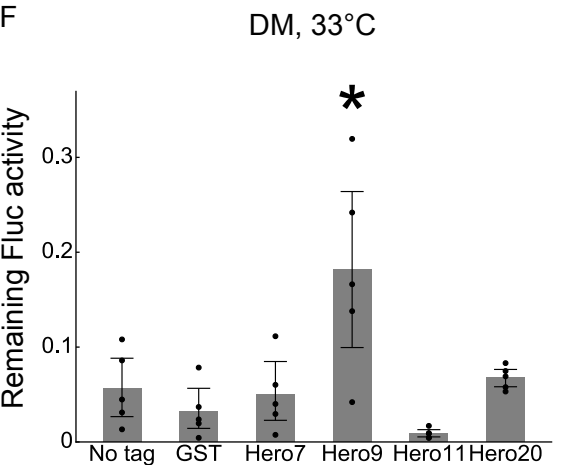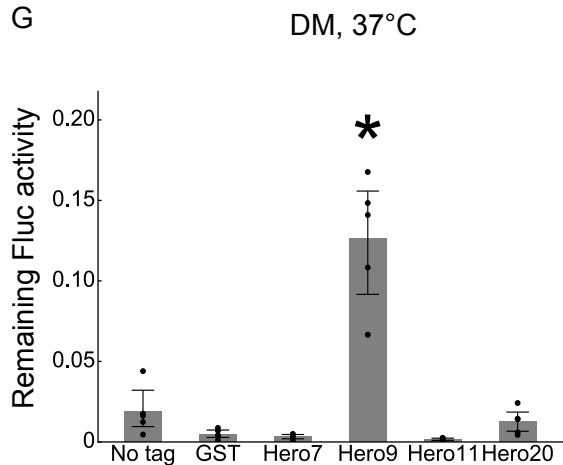

Figure 4

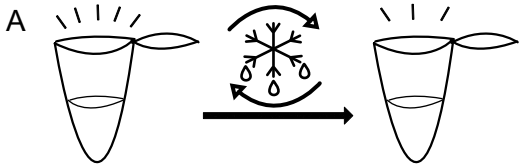

Fluc-WT, SM, or DM

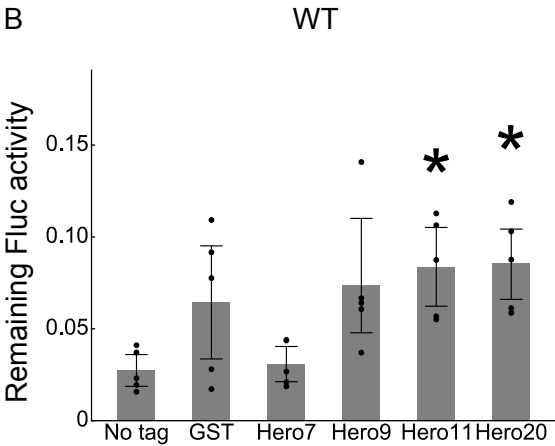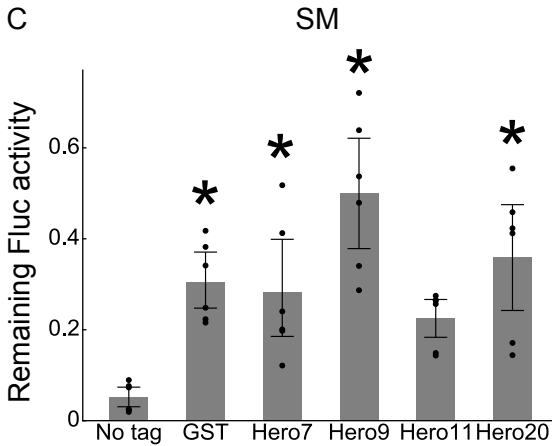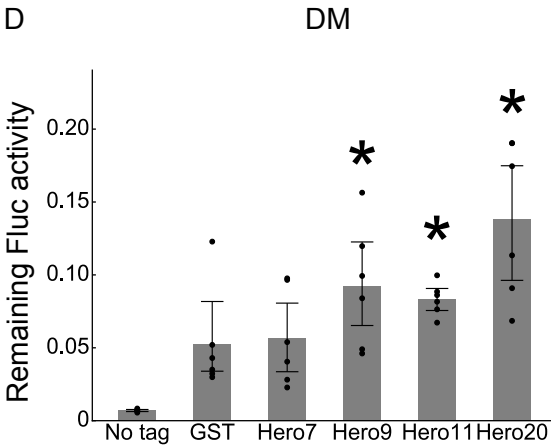

Figure 5

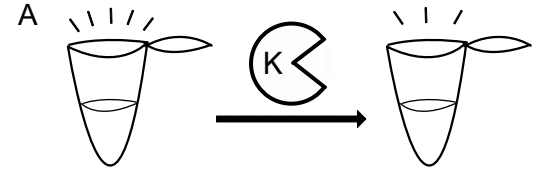

Fluc-WT, SM, or DM

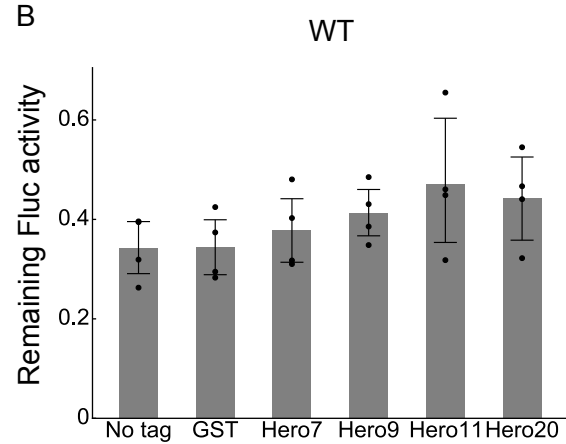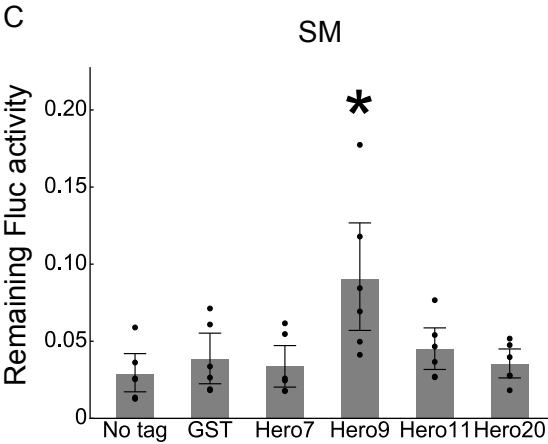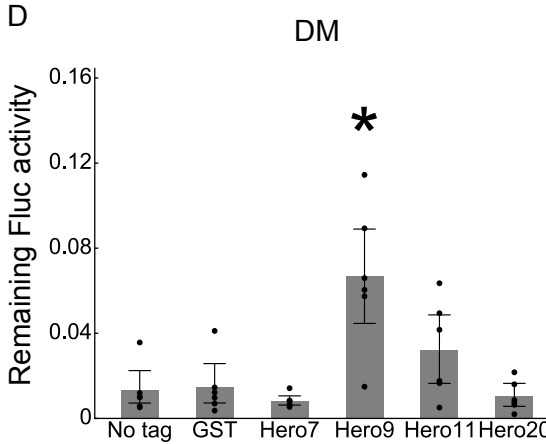

## Supplemental Figure 1

bioRxiv preprint doi: <https://doi.org/10.1101/2022.03.03.482928>; this version posted June 11, 2022. The copyright holder for this preprint (which was not certified by peer review) is the author/funder, who has granted bioRxiv a license to display the preprint in perpetuity. It is made available under a [CC-BY-NC-ND 4.0 International license](#).

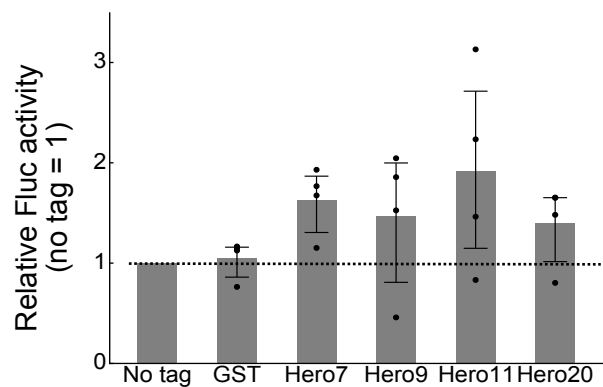

## Supplemental Figure 2

bioRxiv preprint doi: <https://doi.org/10.1101/2022.03.03.482928>; this version posted June 11, 2022. The copyright holder for this preprint (which was not certified by peer review) is the author/funder, who has granted bioRxiv a license to display the preprint in perpetuity. It is made available under a [CC-BY-NC-ND 4.0 International license](#).

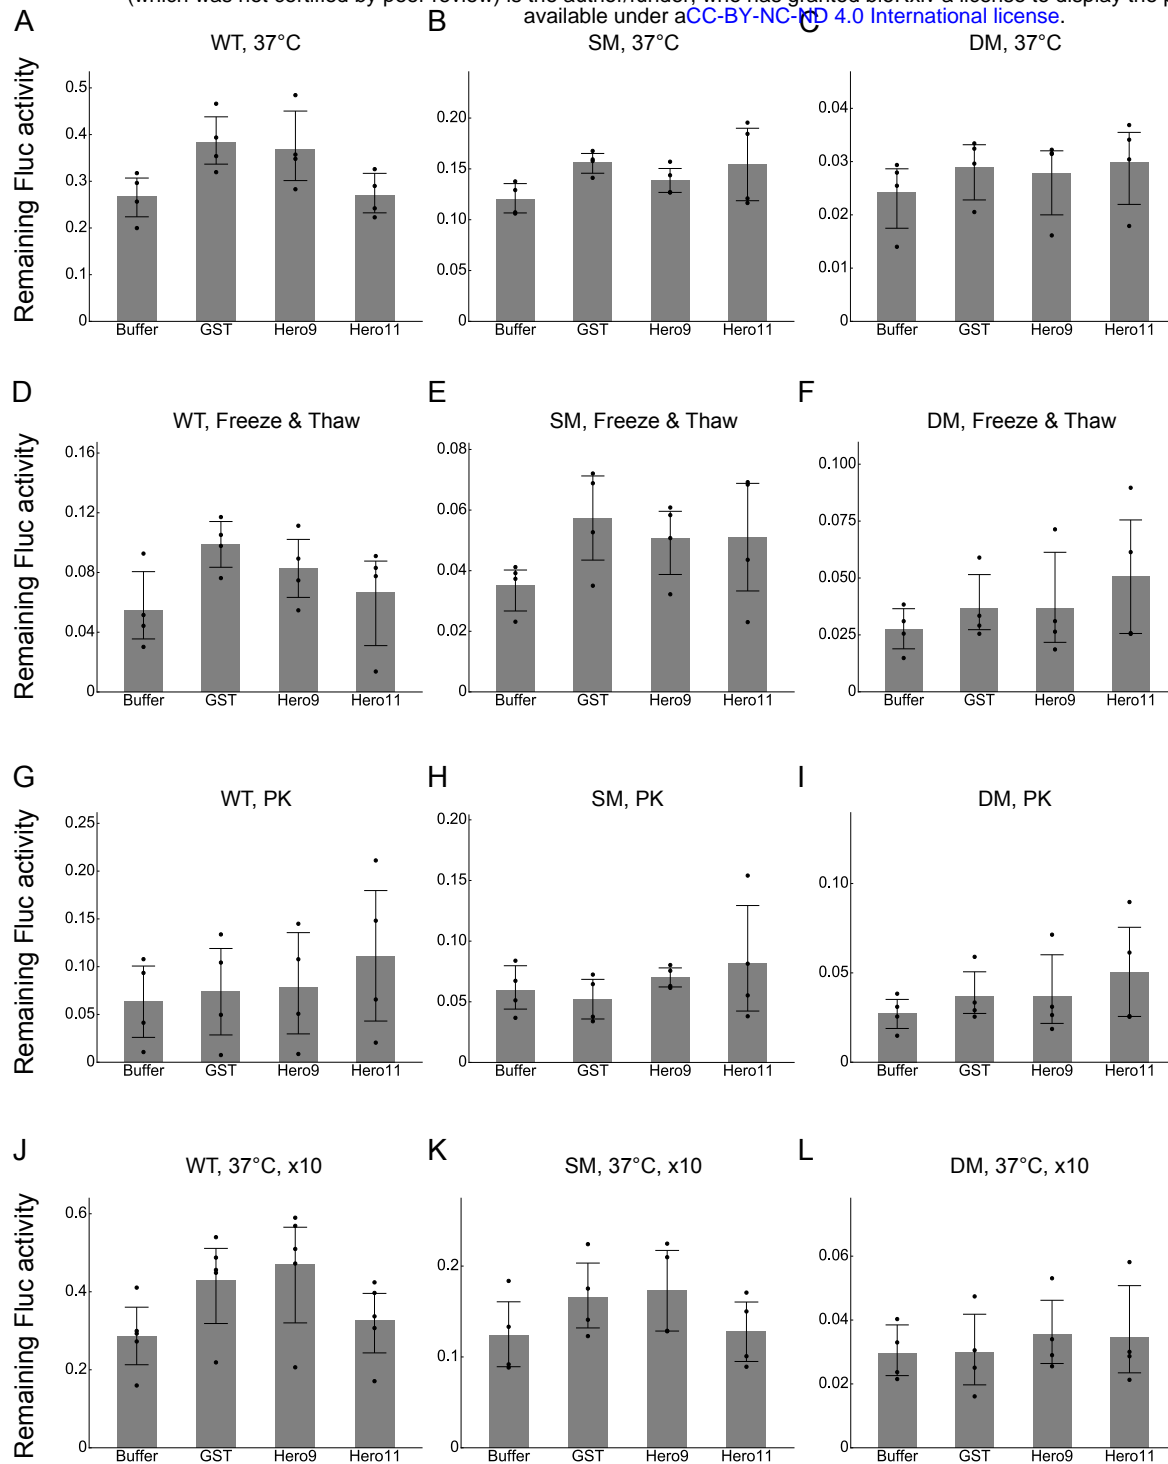

### Supplemental Figure 3

bioRxiv preprint doi: <https://doi.org/10.1101/2022.03.03.482928>; this version posted June 11, 2022. The copyright holder for this preprint (which was not certified by peer review) is the author/funder, who has granted bioRxiv a license to display the preprint in perpetuity. It is made available under a [CC-BY-NC-ND 4.0 International license](#).

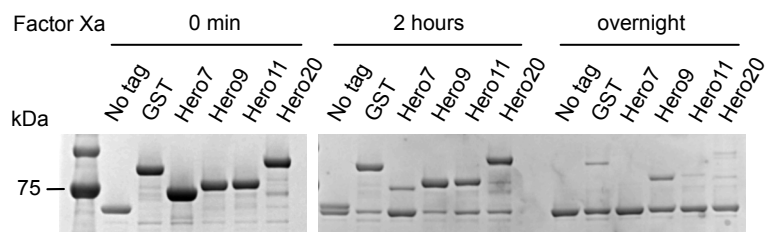

Source: https://www.biorxiv.org/content/10.1101/2022.03.03.482928v2.full.pdf
